# Supplementary material for: Intraperitoneally Delivered Mesenchymal Stem Cells Alleviate Experimental Colitis Through THBS1-Mediated Induction of IL-10-Competent Regulatory B Cells
Source: PubMed Central journal article supplement (PMC8971528; doi:10.3389/fimmu.2022.853894), 2022-03-18
Supplement: DataSheet_1.pdf [file DataSheet_1.pdf]

## Supplementary Material

### Supplementary Figure 1.

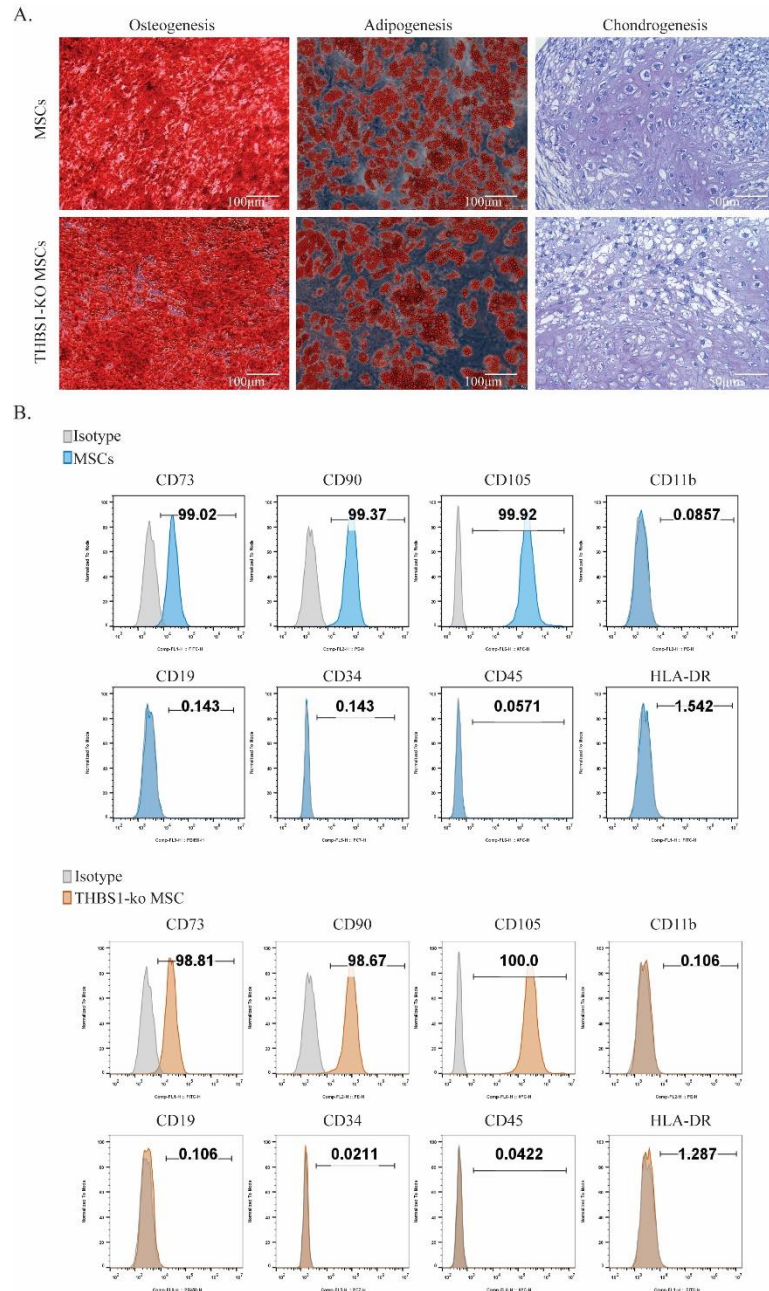

**Figure S1. Identification of Human Bone marrow MSCs.** (A) Oil red O, Alizarin red S, and Toluidine blue O staining were used to assess the adipogenic, osteogenic, and chondrogenic differentiations of MSCs. (B) The expression of CD73, CD90, CD105, CD11b, CD19, CD34, CD45 and HLA-DR on MSCs were detected by Flow Cytometry.

## Supplementary Figure 2.

A.

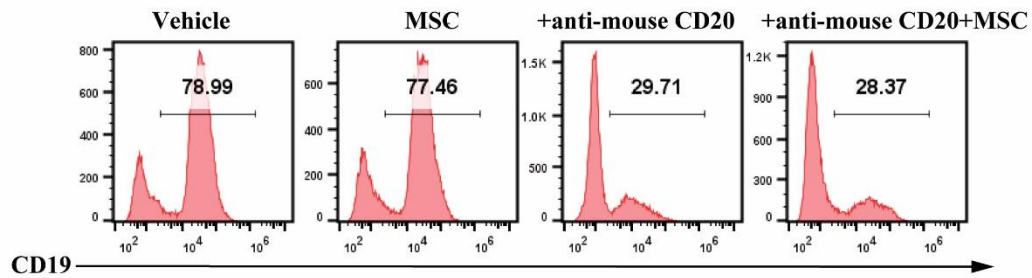

B.

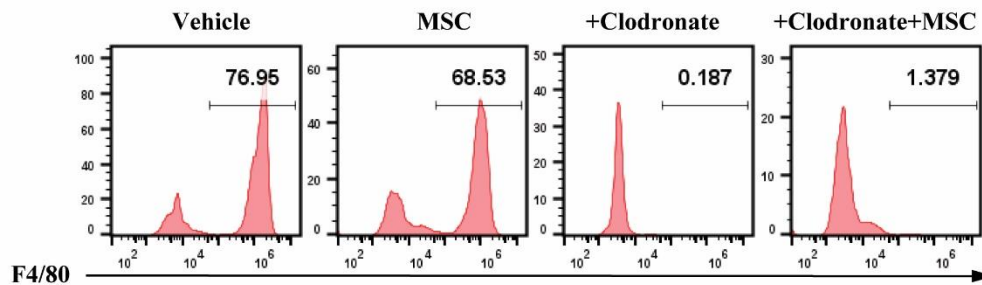

C.

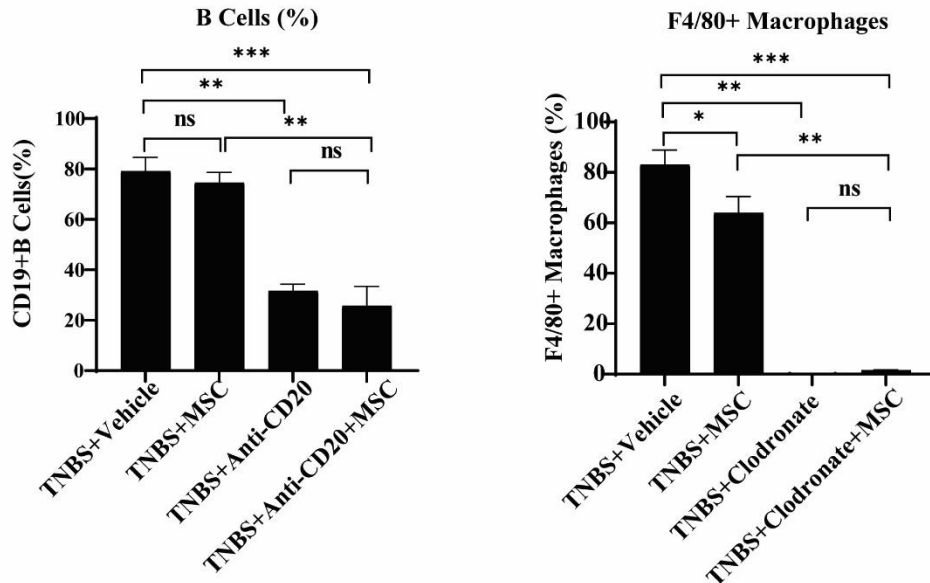

**Figure S2. The Alteration of B cells and macrophage in Peritoneal Cavity.** (A) Representative plots of alteration in percentages of B cells in peritoneal cavity. (B) Representative plots of alteration in percentages of macrophage in peritoneal cavity. (C) Quantification of B cells and macrophage in peritoneal cavity. Data are mean  $\pm$  SD; not significant (ns)  $p \geq 0.05$ , \* $p < 0.05$ , \*\* $p < 0.01$ , \*\*\* $p < 0.001$ , \*\*\*\* $p < 0.0001$ .

Supplementary Figure 3.

A.

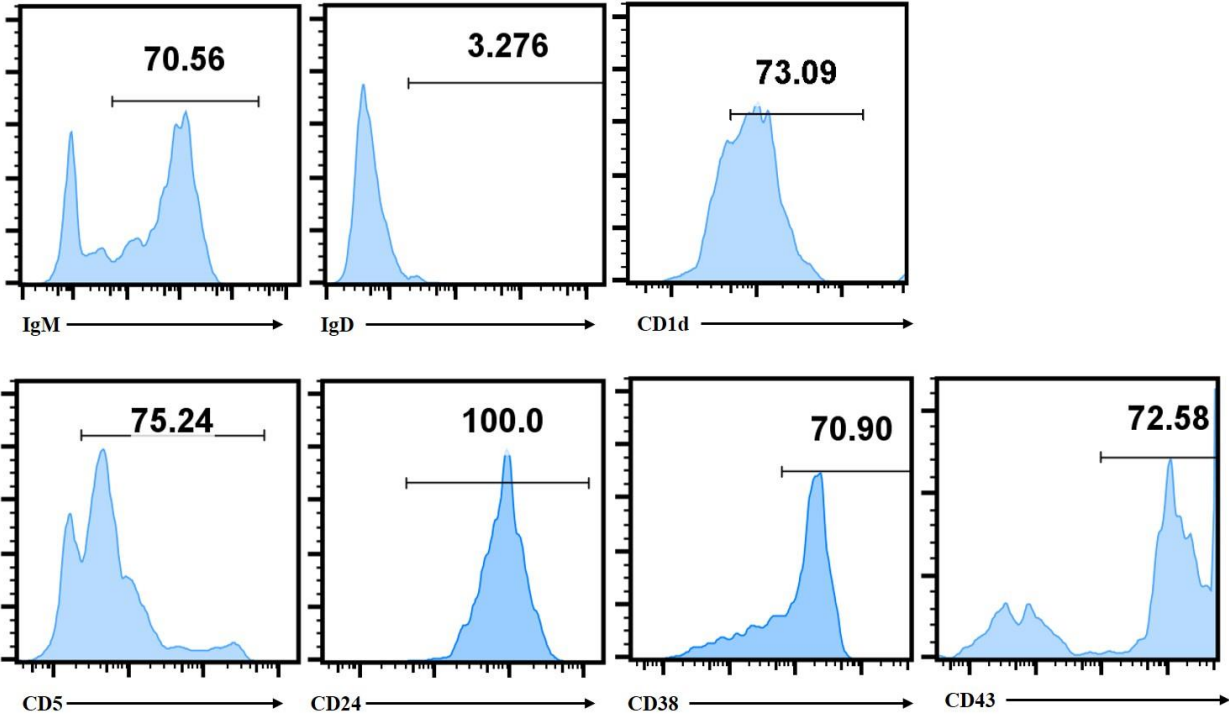

**Figure S3. Surface Phenotype of MSC-induced IL-10<sup>+</sup>Bregs.** Peritoneal B cells were isolated from colitic mice with MSCs treatment, and the phenotype of IL-10<sup>+</sup>Bregs were detected, including IgM, IgD, CD1d, CD5, CD24, CD38, CD43.

## Supplementary Figure 4.

A.

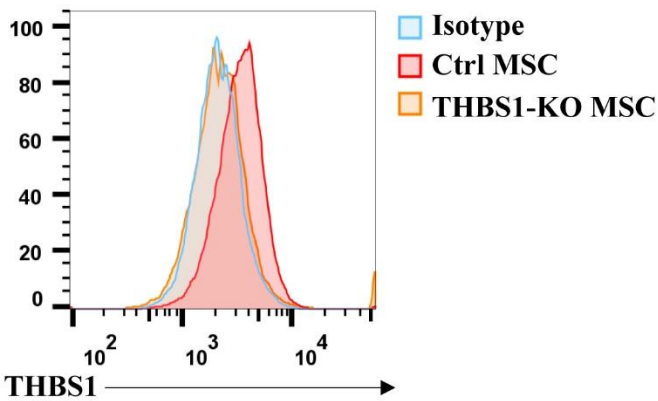

B.

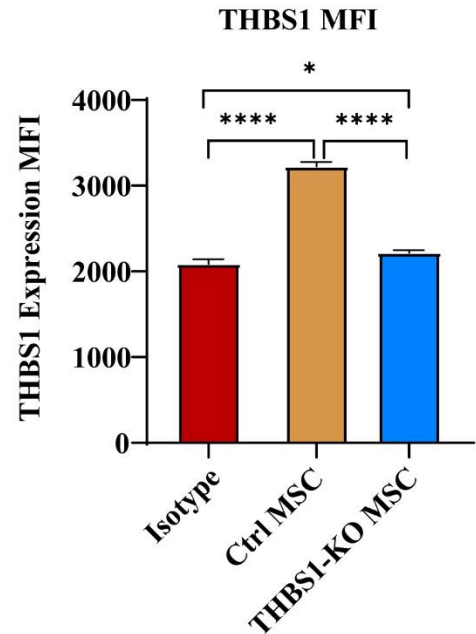

C.

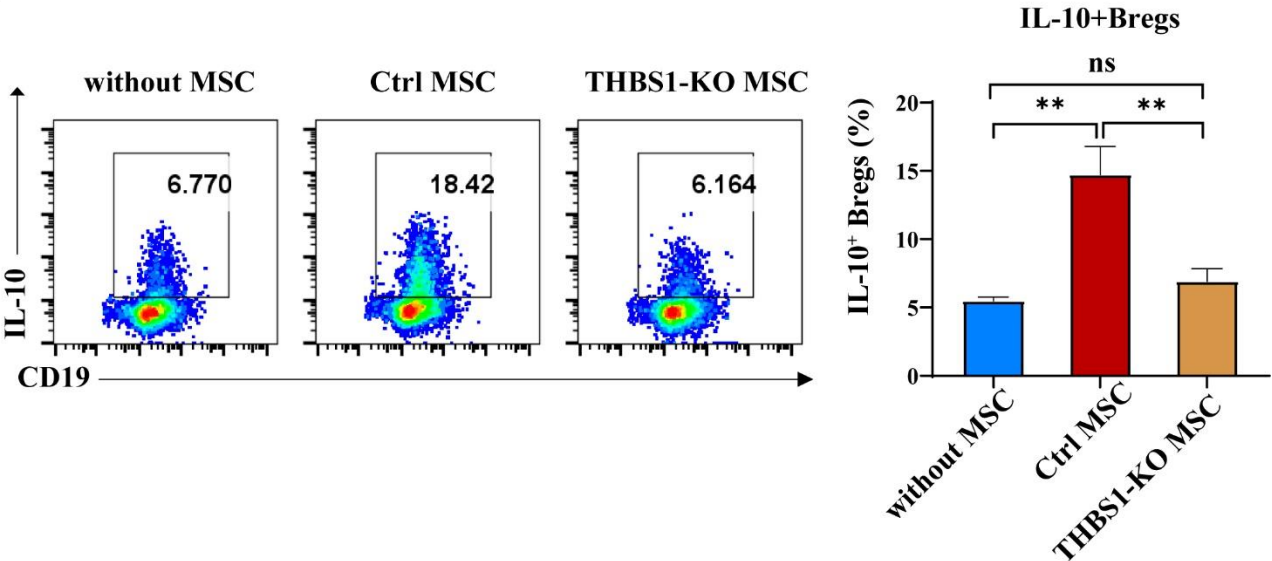

**Figure S4. THBS1 Knockout in MSCs impaired their capacity to induce IL-10 producing Bregs in vitro.** (A) The expressions of THBS1 were detected by flow cytometry. (B) Quantification of the Mean Fluorescence Intensity (MFI) of THBS1 both in control MSCs and THBS1-KO MSCs. (C) The alterations of IL-10 producing B cells. Data are mean  $\pm$  SD,  $n \geq 3$ , not significant (ns)  $p \geq 0.05$ , \* $p < 0.05$ , \*\* $p < 0.01$ , \*\*\* $p < 0.001$ , \*\*\*\* $p < 0.0001$ .

Supplementary Figure 5.

A.

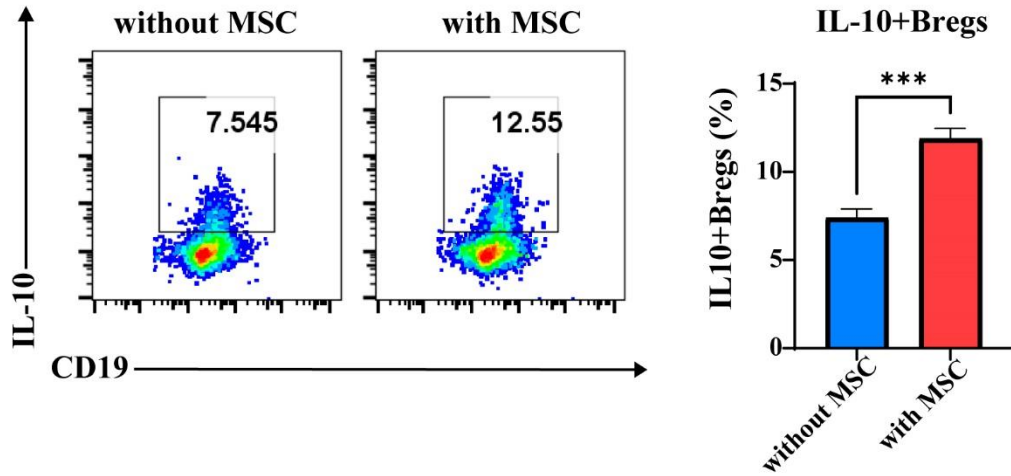

B.

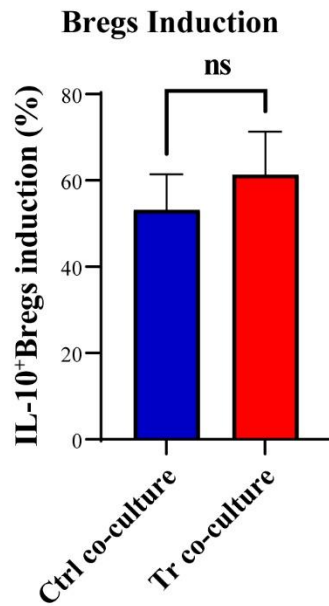

**Figure S5. MSCs induced IL-10<sup>+</sup> Bregs in Transwell indirect co-culture.** (A) IL-10<sup>+</sup>Bregs detection by Transwell indirect co-culture 48hours between MSCs and mice peritoneal cells. (B) IL-10<sup>+</sup>Bregs induction of MSCs in control direct co-culture (Ctrl co-culture) compared with Transwell indirect co-culture (Tr co-culture). Data are mean  $\pm$  SD,  $n \geq 3$ , not significant (ns)  $p \geq 0.05$ , \* $p < 0.05$ , \*\* $p < 0.01$ , \*\*\* $p < 0.001$ , \*\*\*\* $p < 0.0001$ .

## Supplementary Figure 6.

A.

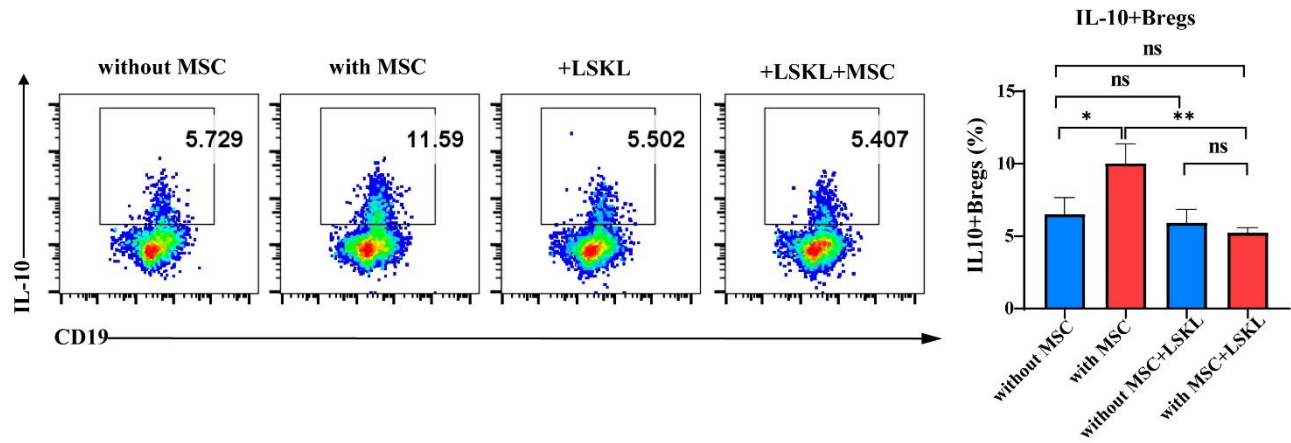

**Figure S6. LSKL Treating MSCs induced IL-10<sup>+</sup> Bregs in vitro.** (A) IL-10<sup>+</sup>Bregs detection by MSCs co-culture and LSKL treated after 48 hours. Statistical significance determined by unpaired two-sided Student's t test. Data are mean  $\pm$  SD,  $n \geq 3$ , not significant (ns)  $p \geq 0.05$ , \* $p < 0.05$ , \*\* $p < 0.01$ , \*\*\* $p < 0.001$ , \*\*\*\* $p < 0.0001$ .

**Supplement material Table 1.****Antibody resources table**

| <b>Antibody</b>                                                                           | <b>Catalog</b> | <b>Manufactory</b> |
|-------------------------------------------------------------------------------------------|----------------|--------------------|
| FITC Mouse Anti-Human CD73                                                                | 561254         | BD Biosciences     |
| PE Mouse anti-Human CD105                                                                 | 560839         | BD Biosciences     |
| APC Mouse Anti-Human CD90                                                                 | 561971         | BD Biosciences     |
| BV421 Mouse Anti-Human CD19                                                               | 562440         | BD Biosciences     |
| PE Mouse Anti-Human CD11b                                                                 | 555388         | BD Biosciences     |
| PE-Cy™7 Mouse Anti-Human CD34                                                             | 560710         | BD Biosciences     |
| APC Mouse Anti-Human CD45RA                                                               | 561210         | BD Biosciences     |
| FITC Mouse Anti-Human HLA-DR                                                              | 555811         | BD Biosciences     |
| PE-Cy™7 Rat Anti-Mouse CD19                                                               | 552854         | BD Biosciences     |
| FITC Rat Anti-Mouse CD5                                                                   | 553021         | BD Biosciences     |
| BV421 Rat Anti-Mouse F4/80                                                                | 565411         | BD Biosciences     |
| APC Rat Anti-Mouse IL-10                                                                  | 554468         | BD Biosciences     |
| APC Rat Anti-Mouse IgM                                                                    | 550676         | BD Biosciences     |
| V450 Rat Anti-Mouse IgD                                                                   | 560869         | BD Biosciences     |
| PE Rat Anti-Mouse CD1d                                                                    | 12-0011-82     | Invitrogen         |
| FITC Rat Anti-Mouse CD24                                                                  | 11-0242-82     | Invitrogen         |
| PE Rat Anti-mouse CD38                                                                    | 102707         | BioLegend          |
| PE Rat Anti-mouse CD43                                                                    | 553271         | BD Biosciences     |
| Anti-Thrombospondin 1 antibody                                                            | ab1823         | Abcam              |
| Goat anti-Mouse IgG (H+L) Cross-Adsorbed ReadyProbes™ Secondary Antibody, Alexa Fluor 594 | R37121         | Invitrogen         |
